# Supplementary material
Source: PubMed Central journal article supplement (PMC4052271)
Supplement: mmc1.pdf [file mmc1.pdf]

# Probing the transmembrane structure and dynamics of microsomal cytochrome P450 reductase by solid-state NMR

Rui Huang\*, Kazutoshi Yamamoto\*, Meng Zhang\*, Nataliya Popovych\*, Ivan Hung<sup>†</sup>, Sang-choul Im<sup>†</sup>, Zhehong Gan<sup>‡</sup>, Lucy Waskell<sup>†</sup> and Ayyalusamy Ramamoorthy\*

\*Biophysics and Department of Chemistry, University of Michigan, Ann Arbor, MI, 48109-1055; <sup>†</sup>Department of Anesthesiology, University of Michigan, and VA Medical Center, Ann Arbor, MI 48105; <sup>‡</sup>National High Magnetic Field Lab, Tallahassee, FL, 32310-3708.

## Supporting Material

**Amino acid sequence of membrane-bound FMN binding domain (MFBD) of rat CPR. The transmembrane domain is underlined according to TMHMM prediction (1).**

|            |            |                  |                  |                   |            |
|------------|------------|------------------|------------------|-------------------|------------|
| 10         | 20         | 30               | 40               | 50                | 60         |
| MGDSHEDTSA | TMPEAVAEV  | <u>SLFSTDMVL</u> | <u>FSLIVGLTY</u> | <u>WFIFRKKKEE</u> | IPEFSKIQTT |
| 70         | 80         | 90               | 100              | 110               | 120        |
| APPVKESFV  | EKMKKTGRNI | IVFYGSQTGT       | AEEFANRLSK       | DAHRYGMRGM        | SADPEEYDLA |
| 130        | 140        | 150              | 160              | 170               | 180        |
| DLSSLPEIDK | SLVVFCMATY | GEGDPTDNAQ       | DFYDWLQETD       | VDLTGVKFAV        | FGLGNKTYEH |
| 190        | 200        | 210              | 220              | 230               |            |
| FNAMGKYVDQ | RLEQLGAQRI | FELGLGDDD        | NLEEDFITWR       | EQFWPAVCEF        | FGVEATGEE  |

## References

1. Krogh, A., B. Larsson, G. von Heijne, and E. L. Sonnhammer. 2001. Predicting transmembrane protein topology with a hidden Markov model: application to complete genomes. *J Mol Biol* 305:567-580.
